# Supplementary material
Source: MDPI journal article supplement (https://www.mdpi.com/2073-4441/14/21/3411)
Supplement: s1 [file s1 › water-1968681-supplementary.pdf]

## **Supplementary information**

### **Chitosan/graphite/polyvinyl alcohol magnetic hydrogel microspheres for decontamination of Reactive Orange 16 dye**

**Priyanka Doondani <sup>1</sup>, Ravin Jugade <sup>1,\*</sup>, Vaishnavi Gomase <sup>1</sup>, Anita Shekhawat <sup>1</sup>, Apurva Bambal <sup>1</sup>, Sadanand Pandey <sup>2\*</sup>**

*<sup>1</sup>Department of Chemistry, RTM Nagpur University, Nagpur-440033, India*

*<sup>2</sup>Department of Chemistry, College of Natural Science, Yeungnam University, 280 Daehak-Ro, Gyeongsan, Gyeongbuk 38541, Korea.*

\*Correspondence: ravinj2001@yahoo.co.in (Ravin Jugade), sadanand.au@gmail.com (Sadanand Pandey)

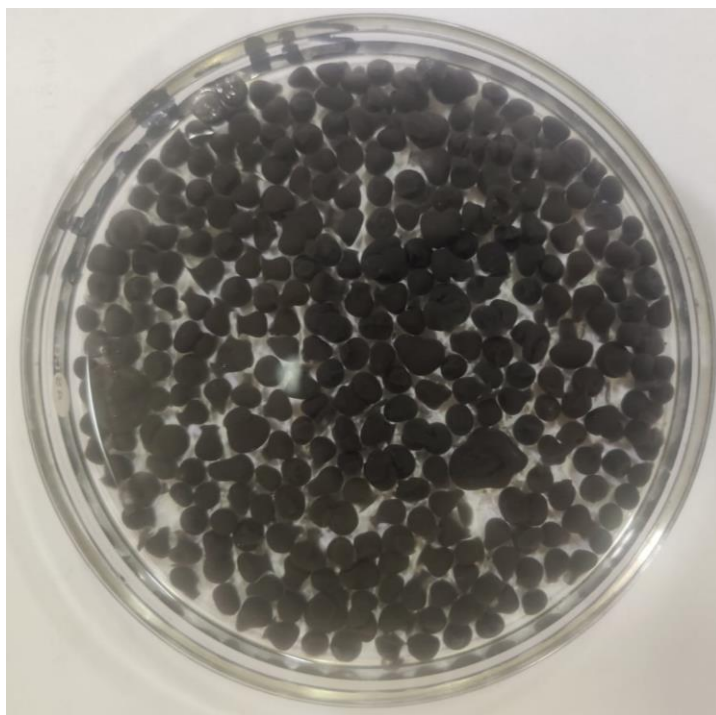

**Figure S1:** As formed hydrogel beads of m-CGPA

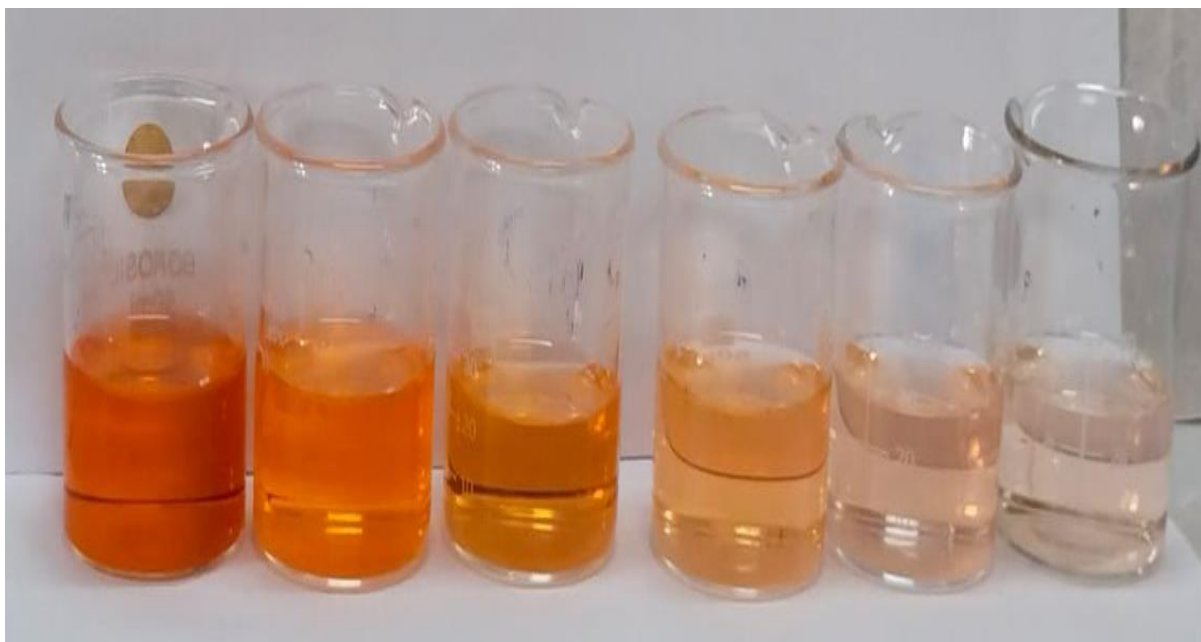

**Figure S2:** Removal of dye at by m-CGPA at different time intervals.

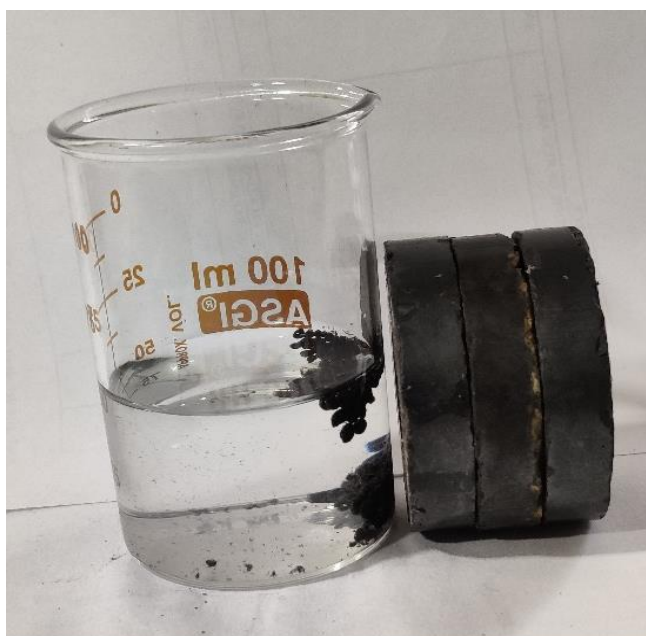

**Figure S3:** Magnetic separation of m-CGPA using external magnet

**Supplementary Table S1:** Linearized equations of the adsorption isotherm models studied.

| <b>Isotherm model</b> | <b>Linearized Equation</b>                                | <b>Parameter</b> | <b>Significance</b>                                                           |
|-----------------------|-----------------------------------------------------------|------------------|-------------------------------------------------------------------------------|
| Langmuir              | $\frac{C_e}{q_e} = \frac{1}{q_m b} + \frac{C_e}{q_m}$     | $q_m$            | Maximum Cr <sup>VI</sup> adsorption capacity (mg g <sup>-1</sup> )            |
|                       | Monolayer adsorption on homogeneous adsorbent surface     | $b$              | Constant related to affinity of binding sites (L mg <sup>-1</sup> )           |
|                       | $R_L = \frac{1}{1 + bC_0}$                                | $R_L$            | Dimensionless separation factor ( $R_L < 1$ represents favourable adsorption) |
| Freundlich            | $\log q_e = \log K_F + \frac{1}{n} \log C_e$              | $K_F$            | Adsorption capacity (mg <sup>1-1/n</sup> g <sup>-1</sup> L <sup>-1</sup> )    |
|                       | Multilayer adsorption on heterogeneous adsorption surface | $n$              | Adsorption intensity (1<n<10 represents strong interaction)                   |
